# Supplementary material for: Bio-Fabrication of Euryale ferox (Makhana) Leaf Silver Nanoparticles and Their Antibacterial, Antioxidant and Cytotoxic Potential
Source: MDPI journal article supplement (doi:10.3390/plants11202766), 2022-10-19
Supplement: s1 [file s1]

## Supplementary file

Table S1. Antibacterial activity of green synthesized AgNPs against *B. subtilis*, and *E. coli*

| Treatment     | Conc. (ppm) | <i>B. subtilis</i>       |             | <i>E. coli</i>           |            |
|---------------|-------------|--------------------------|-------------|--------------------------|------------|
|               |             | ZOI after incubation (h) |             | ZOI after incubation (h) |            |
|               |             | 12                       | 24          | 12                       | 24         |
| Media control |             | 0.00±0.00                | 0.00±0.00   | 0.00±0.00                | 0.00±0.00  |
| ELAgNPs       | 1           | -                        | -           | -                        | -          |
|               | 10          | -                        | -           | -                        | -          |
|               | 50          | -                        | -           | -                        | -          |
|               | 100         | -                        | 15.27±0.43  | -                        | -          |
|               | 250         | 20.85± 0.86              | 21.03±0.53  | 13.56±0.59               | 15.23±0.42 |
|               | 500         | 20.97± 0.24              | 21.98±0.59  | 15.31±0.31               | 16.46±0.22 |
| CAgNPs        | 1           | -                        | -           | -                        | -          |
|               | 10          | -                        | -           | -                        | -          |
|               | 50          | -                        | -           | -                        | -          |
|               | 100         | -                        | -           | -                        | -          |
|               | 250         | -                        | -           | -                        | -          |
|               | 500         | -                        | -           | -                        | -          |
| SN            | 1           | -                        | -           | -                        | -          |
|               | 10          | -                        | 11.20 ±0.71 | -                        | -          |
|               | 50          | -                        | 18.47 ±0.83 | 14.11±0.43               | 14.86±0.36 |
|               | 100         | 13.85 ± 0.35             | 20.12 ±0.76 | 14.83±0.58               | 15.07±0.48 |
|               | 250         | 16.27 ± 0.73             | 21.11 ±0.62 | 15.45±0.63               | 16.93±0.89 |
|               | 500         | 16.83± 0.42              | 21.42±0.58  | 16.10±0.41               | 17.65±0.45 |
| ELExt         | 1           | -                        | -           | -                        | -          |
|               | 10          | -                        | -           | -                        | -          |
|               | 50          | -                        | -           | -                        | -          |
|               | 100         | -                        | -           | -                        | -          |
|               | 250         | -                        | -           | -                        | -          |
|               | 500         | -                        | -           | -                        | -          |

Note: - indicates no ZOI observed. Data is presented as Mean±SD of four replicates.

(where, ELAgNPs= aqueous leaf extract of *E. ferox* based AgNPs, CAgNPs= commercial AgNPs, SN= AgNO<sub>3</sub> solution, and ELExt= aqueous leaf extract of *E. ferox*)

Table S2. Cytotoxic effect of green synthesized ELAgNPs against Vero cell line

| Treatment                   | Conc. (ppm) | OD        | Cell mortality (%) | LC <sub>50</sub> (ppm) | P value ( $\alpha=0.05$ , 95% CI)                  |
|-----------------------------|-------------|-----------|--------------------|------------------------|----------------------------------------------------|
| Cell control (No treatment) |             | 1.19±0.01 | 0.00±0.51          | —                      | —                                                  |
| ELExt                       | 1.0         | 1.19±0.00 | 0.14±0.17          | —                      | —                                                  |
|                             | 2.5         | 1.19±0.00 | 0.31±0.30          |                        |                                                    |
|                             | 5.0         | 1.18±0.01 | 0.53±0.46          |                        |                                                    |
|                             | 10.0        | 1.18±0.00 | 0.53±0.35          |                        |                                                    |
|                             | 25.0        | 1.18±0.01 | 1.04±0.56          |                        |                                                    |
|                             | 50.0        | 1.17±0.00 | 1.32±0.39          |                        |                                                    |
|                             | 100.0       | 1.18±0.00 | 0.87±0.05          |                        |                                                    |
|                             | 250.0       | 1.17±0.01 | 1.57±0.56          |                        |                                                    |
|                             | 500.0       | 1.18±0.01 | 1.02±1.04          |                        |                                                    |
| ELAgNPs <sup>a</sup>        | 1.0         | 1.19±0.00 | 0.17±0.22          | 9.54±0.35              | (****) $p<0.0001^{a-b}$<br>(*) $0.01<p<0.05^{a-c}$ |
|                             | 2.5         | 1.00±0.03 | 15.60±2.62         |                        |                                                    |
|                             | 5.0         | 0.73±0.02 | 38.43±1.93         |                        |                                                    |
|                             | 10.0        | 0.15±0.02 | 87.68±1.27         |                        |                                                    |
|                             | 25.0        | 0.08±0.01 | 93.33±0.85         |                        |                                                    |
|                             | 50.0        | 0.05±0.02 | 95.77±1.72         |                        |                                                    |
|                             | 100.0       | 0.03±0.02 | 97.73±1.29         |                        |                                                    |
|                             | 250.0       | 0.01±0.01 | 99.10±0.72         |                        |                                                    |
|                             | 500.0       | 0.00±0.00 | 99.83±0.22         |                        |                                                    |
| CAgNPs <sup>b</sup>         | 1.0         | 1.19±0.01 | 0.36±0.43          | 120.9±6.31             | (****) $p<0.0001^{b-a}$<br>(****) $p<0.0001^{b-c}$ |
|                             | 2.5         | 1.19±0.00 | 0.39±0.38          |                        |                                                    |
|                             | 5.0         | 1.18±0.01 | 0.50±0.50          |                        |                                                    |
|                             | 10.0        | 1.18±0.01 | 0.70±0.64          |                        |                                                    |
|                             | 25.0        | 1.07±0.03 | 9.94±2.19          |                        |                                                    |
|                             | 50.0        | 0.95±0.04 | 19.80±3.04         |                        |                                                    |
|                             | 100.0       | 0.65±0.03 | 45.60±2.35         |                        |                                                    |
|                             | 250.0       | 0.23±0.05 | 80.48±4.33         |                        |                                                    |
|                             | 500.0       | 0.01±0.00 | 99.05±0.30         |                        |                                                    |
| SN <sup>c</sup>             | 1.0         | 1.19±0.01 | 0.39±0.42          | 20.74±0.63             | (*) $0.01<p<0.05^{c-a}$<br>(****) $p<0.0001^{c-b}$ |
|                             | 2.5         | 1.18±0.01 | 0.53±0.71          |                        |                                                    |
|                             | 5.0         | 1.18±0.01 | 0.78±0.85          |                        |                                                    |
|                             | 10.0        | 1.18±0.00 | 0.76±0.08          |                        |                                                    |
|                             | 25.0        | 0.37±0.03 | 68.63±2.61         |                        |                                                    |
|                             | 50.0        | 0.16±0.04 | 86.16±3.23         |                        |                                                    |
|                             | 100.0       | 0.03±0.01 | 97.17±0.61         |                        |                                                    |
|                             | 250.0       | 0.01±0.00 | 99.29±0.19         |                        |                                                    |
|                             | 500.0       | 0.00±0.00 | 99.99±0.02         |                        |                                                    |

Note: – indicates not applicable. Data is presented as Mean±SD of three replicates. <sup>a-c</sup> denote multiple comparisons b/w treatments and \*\*\*\*=extremely significant, and \*= significant

(where, EExt= aqueous leaf extract of *E. ferox*, ELAgNPs= aqueous leaf extract of *E. ferox* based AgNPs, CAgNPs= commercial AgNPs, and SN= AgNO<sub>3</sub> solution)
